# Supplementary material for: Tandem-reduction of DMF with silanes via necklace-type transition over Pt(0) nanoparticles: deciphering the dual Si–H effect as an extension of steric effects
Source: Royal Society of Chemistry journal article supplement (doi:10.1039/c4cc06979j), 2014-01-01
Supplement: c4cc06979j1.pdf [file c4cc06979j1.pdf]

## Supporting Information

to

# Tandem-Reduction of DMF with Silanes via Necklace-type Transition over Pt(0) Nanoparticles: Deciphering the Dual Si-H Effect as an Extension of Steric Effects

*Vijay P. Taori and Michael R. Buchmeiser\**

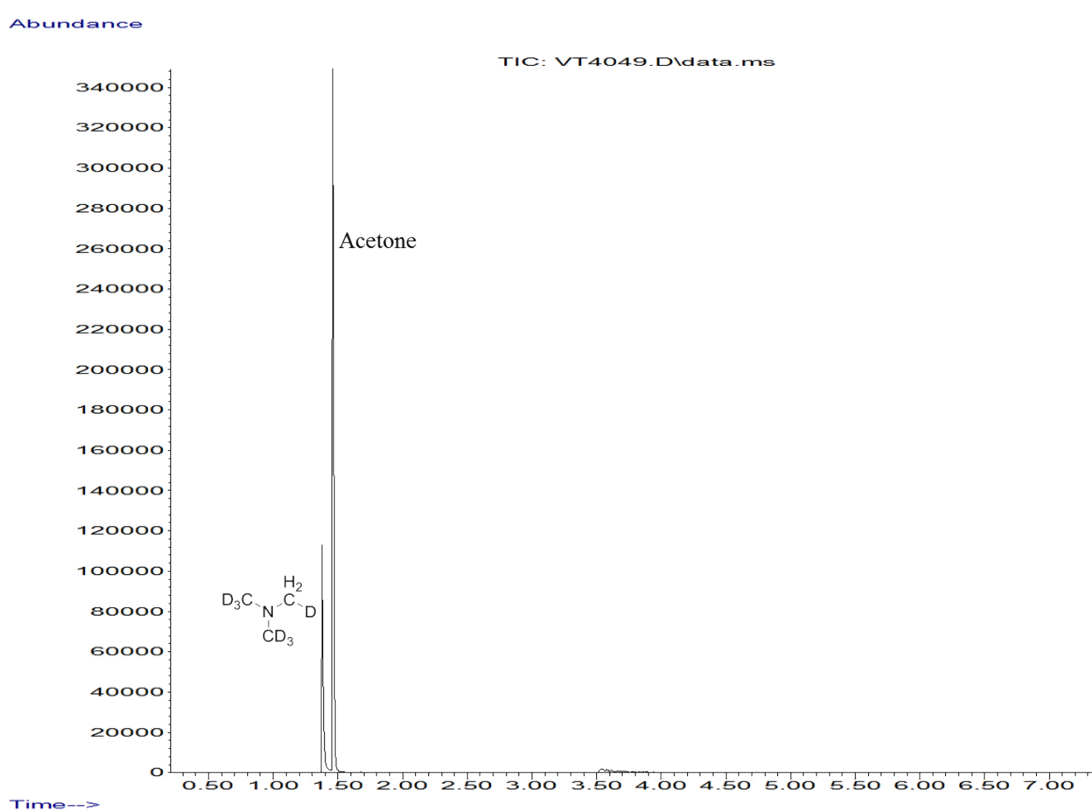

**Figure S1(a).** GC-MS spectrum (head-space experiment) performed on a sample of the reaction mixture containing 600  $\mu$ L of DMF-d<sub>7</sub>, 5 mg of the Pt-containing monolith (357 ppm Pt;  $\sim$ 9 nmol of Pt) and 50  $\mu$ L of diethylsilane. The peak at  $t_R = 1.393$  min, corresponds to trimethylamine-d<sub>7</sub>,  $(CD_3)_2NCH_2D$  with a molecular weight of 66.1 Da.

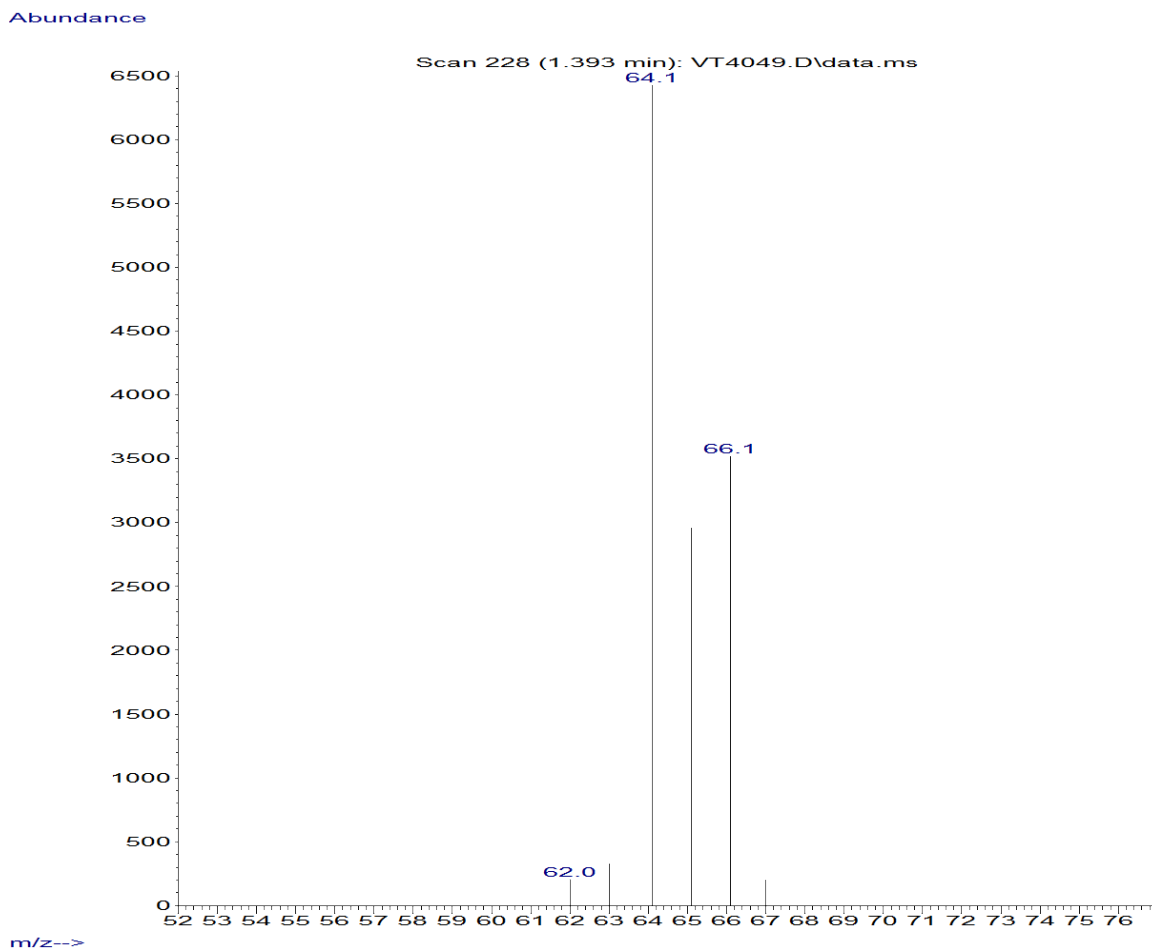

**Figure S1(b).** Fragmentation pattern of the peak at  $t_R = 1.393$  min in the GC-MS spectrum shown in Figure S2(a). The molecular weight of 66.1 Da corresponds to trimethylamine- $d_7$ ,  $(CD_3)_2NCH_2D$ .

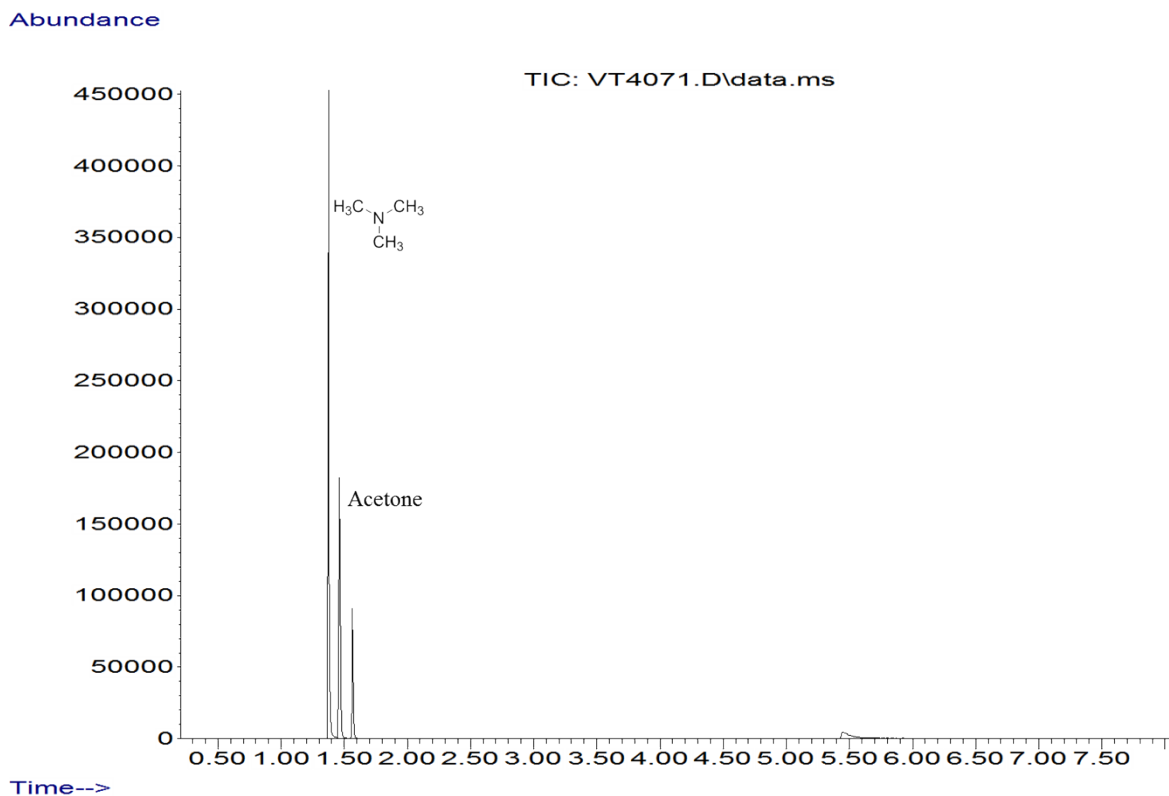

**Figure S2(a).** GC-MS spectrum, head-space experiment performed on commercially purchased trimethylamine in ethanol. The peak at  $t_R = 1.393$  min, corresponds to trimethylamine with a molecular weight of 59.1 Da.

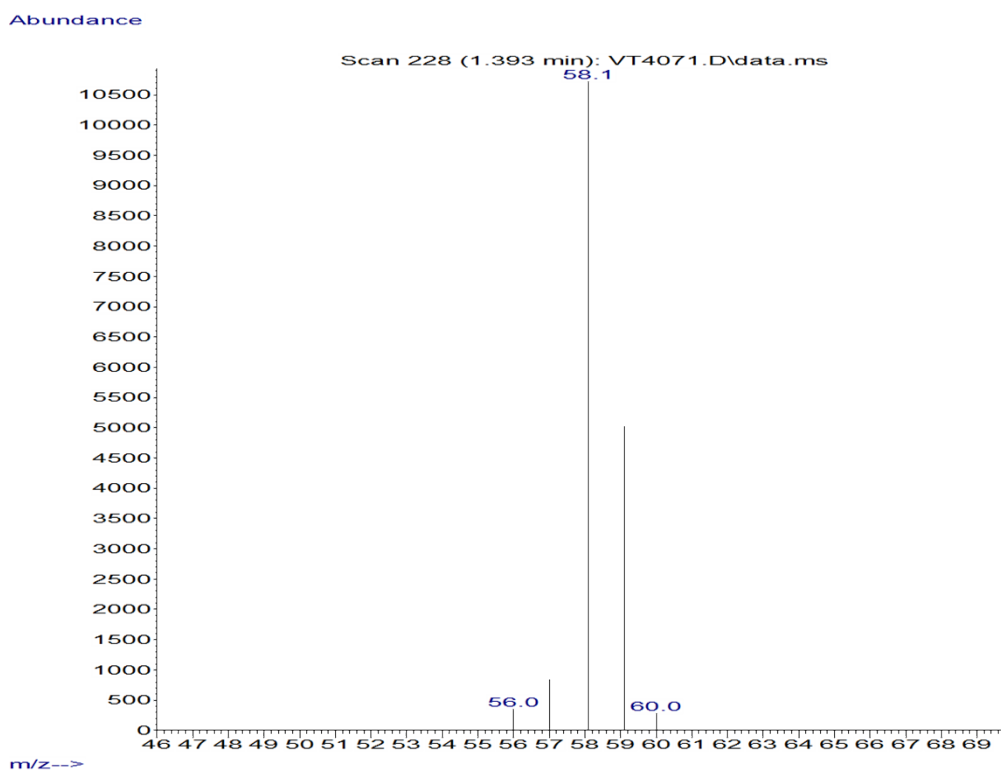

**Figure S2(b).** Fragmentation pattern of the peak at  $t_R = 1.393$  min in the GC-MS spectrum shown in Figure S3(a) containing commercially purchased trimethylamine in ethanol. The molecular weight of 59.1 Da corresponds to trimethylamine.

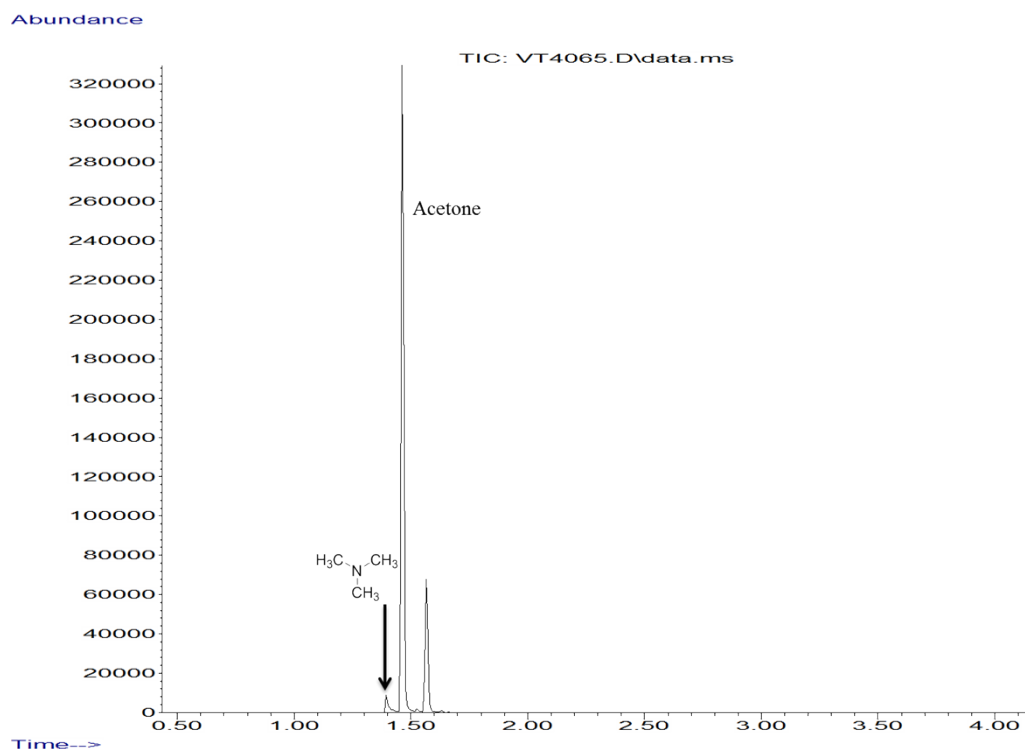

**Figure S3(a).** GC-MS spectrum (head-space experiment) performed on a sample of the reaction mixture containing 50  $\mu\text{L}$  of DMF, 10 mg of Pt-containing monolith (357 ppm Pt loading;  $\sim 18$  nanomole), 50  $\mu\text{L}$  of diethylsilane and 600  $\mu\text{L}$  of DMSO- $d_6$ . The peak at  $t_R = 1.393$  min corresponds to trimethylamine with a molecular weight of 59.1 Da.

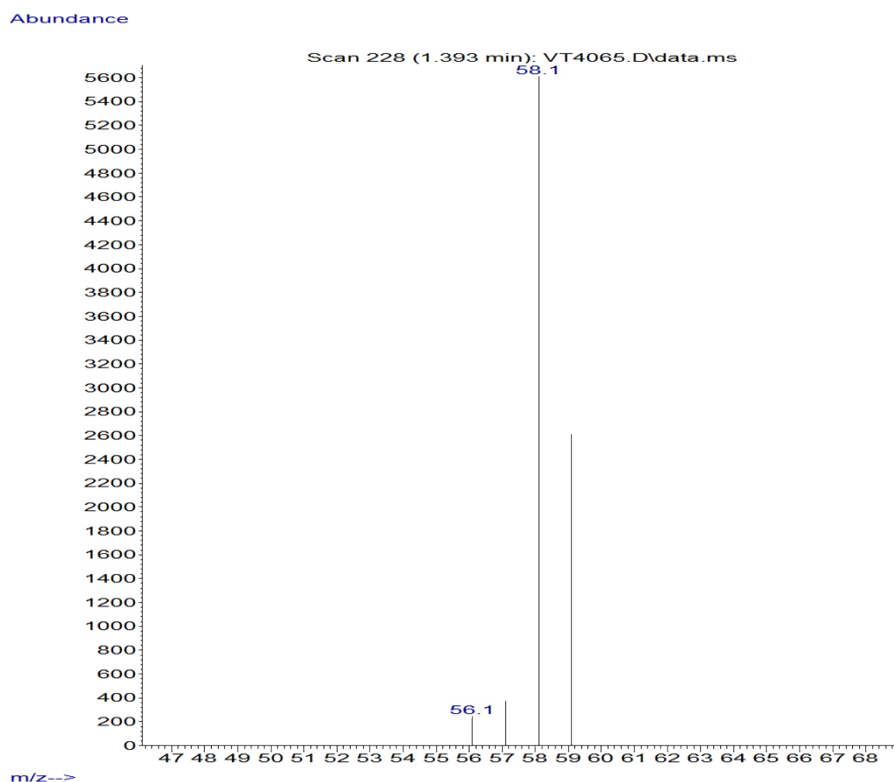

**Figure S3(b).** Fragmentation pattern of the peak at  $t_R = 1.393$  min in the GC-MS spectrum shown in Figure S3(a). The molecular weight of 59.1 Da corresponds to the one of trimethylamine.

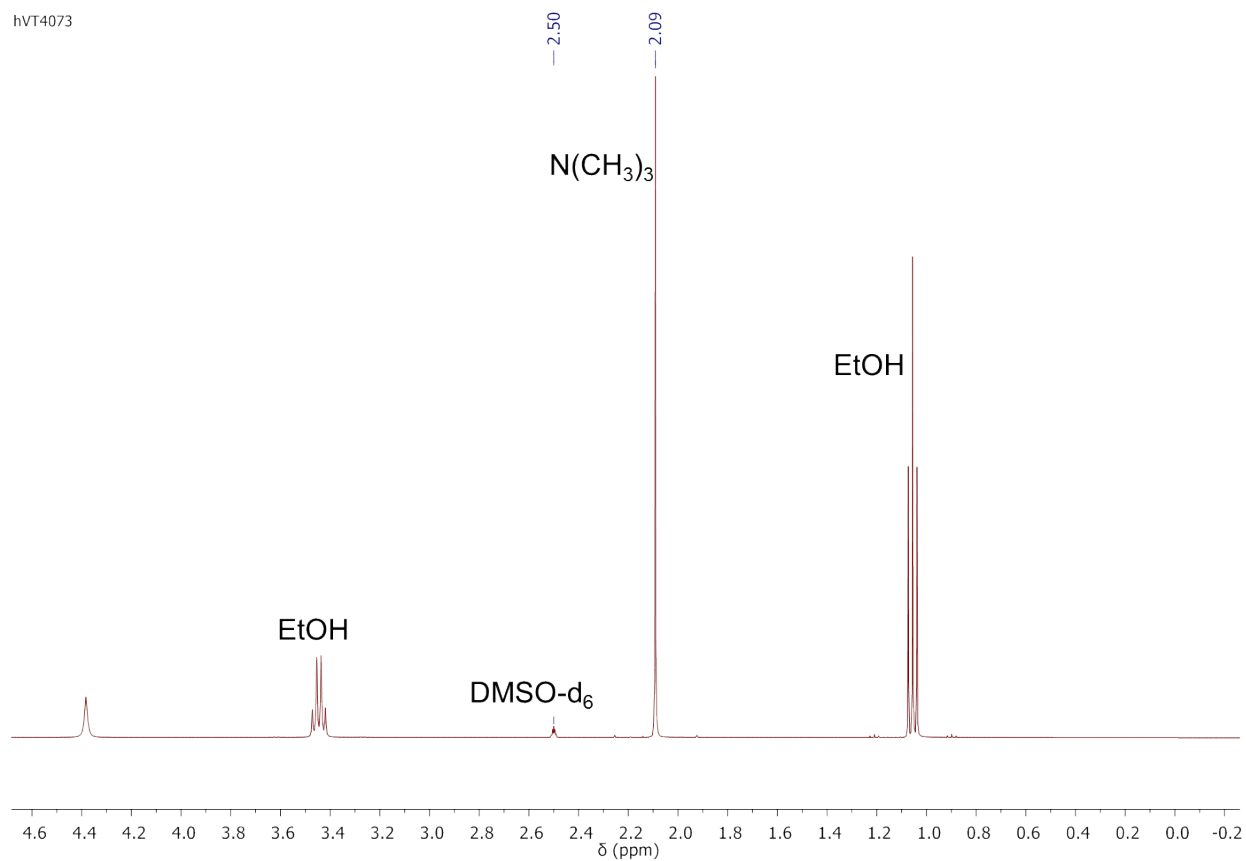

**Figure S4.**  $^1\text{H}$  NMR acquired for commercially purchased trimethylamine in ethanol.

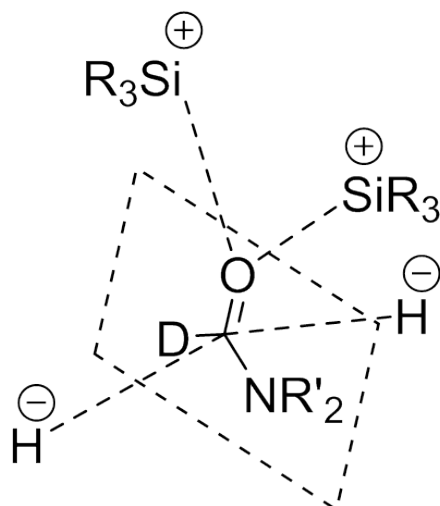

**Figure S5(a).** Transition state which depicts the concerted attack of two hydrides on the DMF-d<sub>7</sub> molecule ( $\text{R}'=\text{CD}_3$ ) implying simultaneous breaking of a  $\text{C}(\text{sp}^2)=\text{O}$  bond, formation of two new  $\text{C}(\text{sp}^3)\text{-H}$  bonds and formation of two new  $\text{Si-O}$  bonds to form compound **2** in **Scheme 2**.

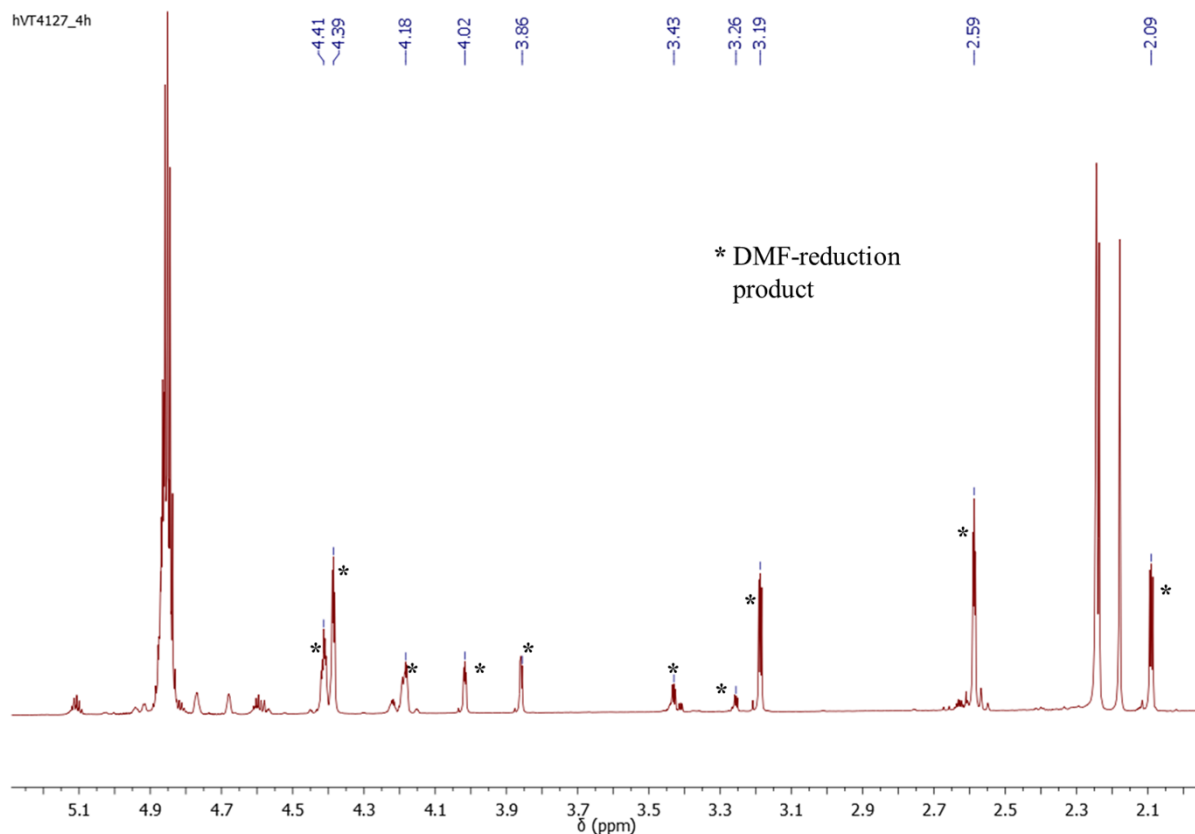

**Figure S5(b).**  $^1\text{H-NMR}$  of the reduction of  $\text{DMF-d}_7$  in presence of Karstedt's catalyst gives multiple DMF-reduction products.  $\delta = 2.09$  ppm, trimethylamine- $\text{d}_7$ . Reaction conditions used from Pannell's study.<sup>1</sup>

Abundance

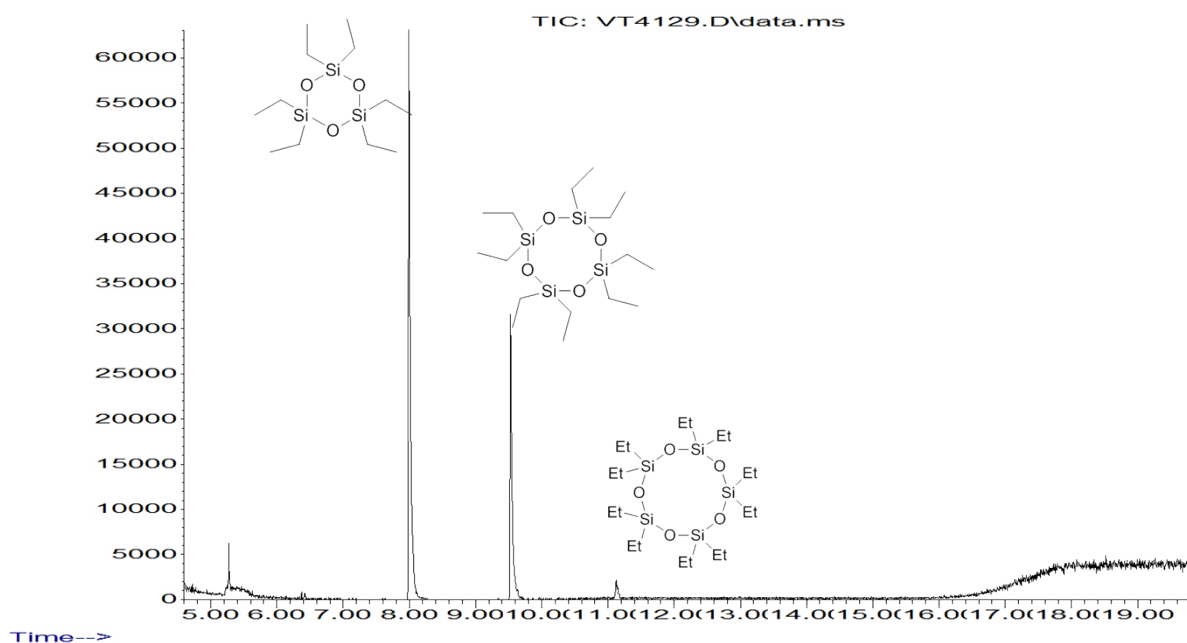

**Figure S6(a).** GC-MS spectrum. Experiment performed on the sample of the reaction mixture containing 600  $\mu\text{L}$  of  $\text{DMF-d}_7$ , 5 mg of the Pt-containing monolith (357 ppm Pt;  $\sim 9$  nanomol of Pt) and 50  $\mu\text{L}$  of diethylsilane. The peak at  $t_R = 7.997$  min, corresponds to a six-membered siloxane ring with a molecular weight of 306.1 Da formed as the side product in the reduction reaction. A peak at  $t_R = 9.531$  min, corresponds to an eight-membered

ring with a molecular weight of 408.2 Da. There is also formation of a peak at  $t_R = 11.127$  min which corresponds to a ten-membered siloxane ring.

Abundance

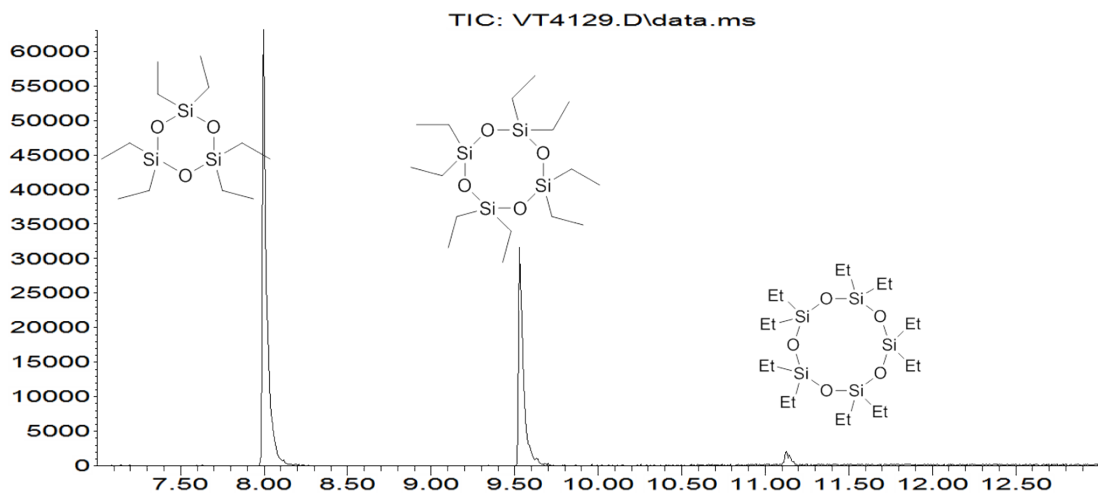

Time-->

**Figure S6(b).** GC-MS spectrum. Expansion of the spectrum shown in Figure S6(a).

Abundance

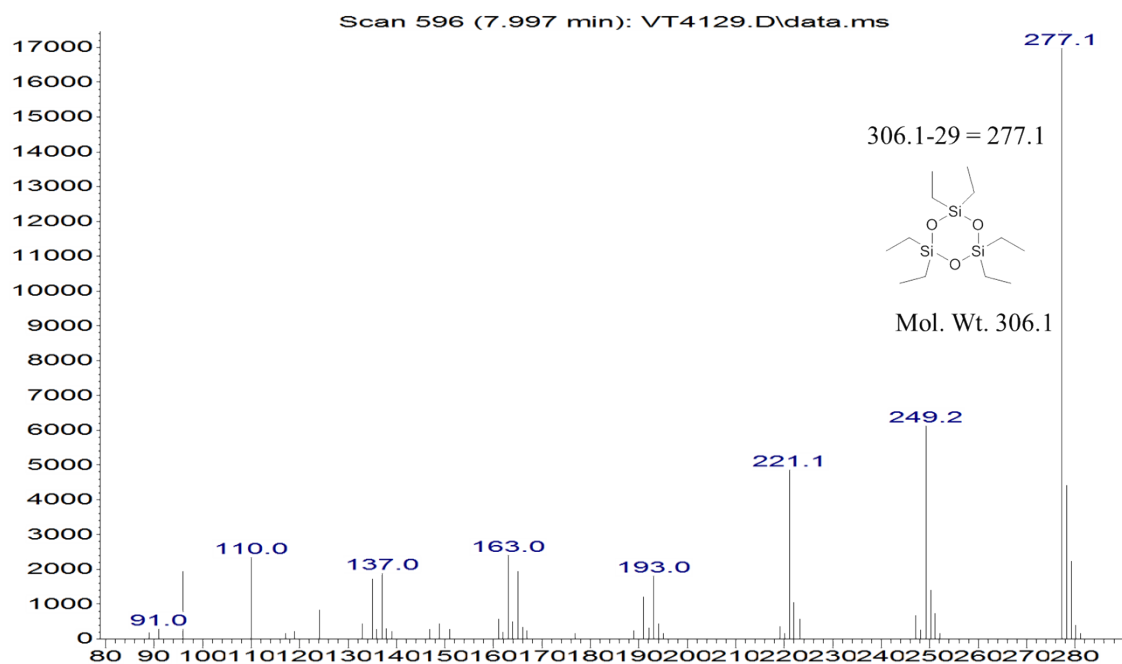

m/z-->

**Figure S6(c).** Fragmentation pattern of the peak at  $t_R = 7.997$  min in the GC-MS spectrum shown in Figure S6(a). The molecular weight of 277.1 Da corresponds to a six-membered siloxane ring minus the molecular weight of the ethyl group.

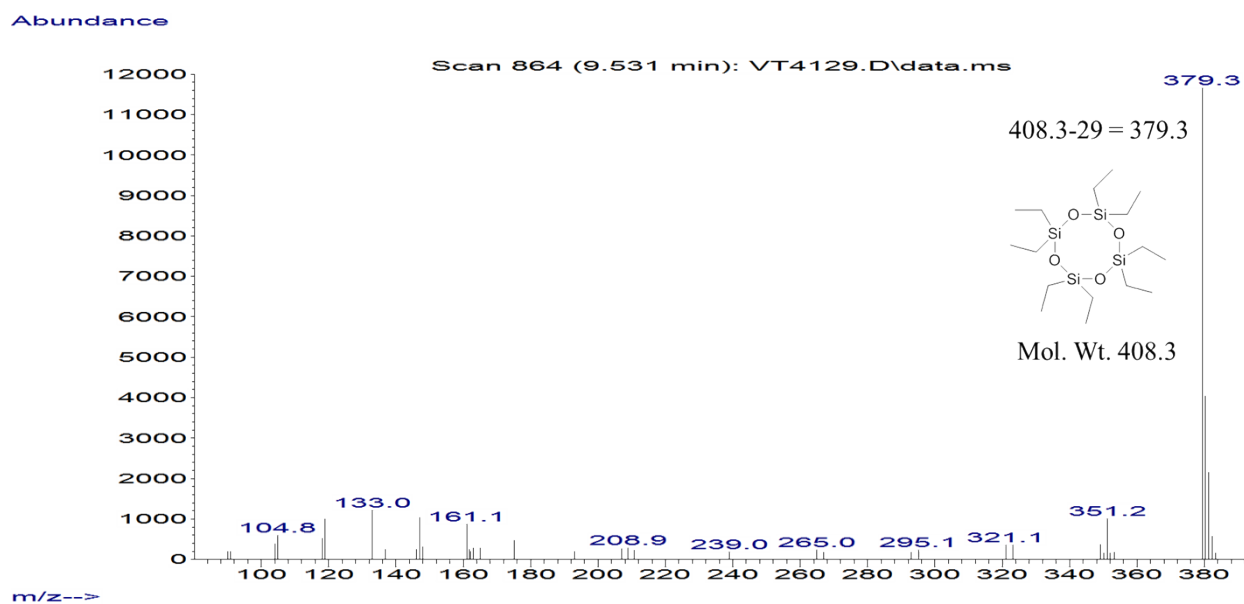

**Figure S6(d).** Fragmentation pattern of the peak at  $t_R = 9.531$  min in the GC-MS spectrum shown in Figure S6(a). The molecular weight of 379.3 Da corresponds to an eight-membered siloxane ring minus the molecular weight of the ethyl group.

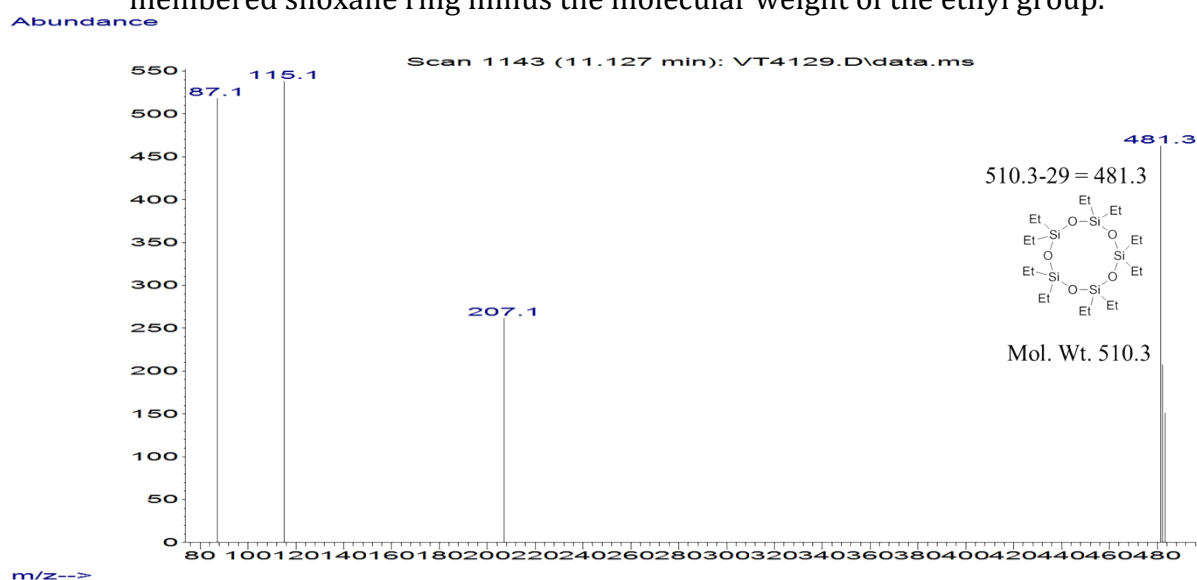

**Figure S6(e).** Fragmentation pattern of the peak at  $t_R = 11.127$  min in the GC-MS spectrum shown in Figure S6(a). The molecular weight of 481.3 Da corresponds to a ten-membered siloxane ring minus the molecular weight of the ethyl group.



Abundance

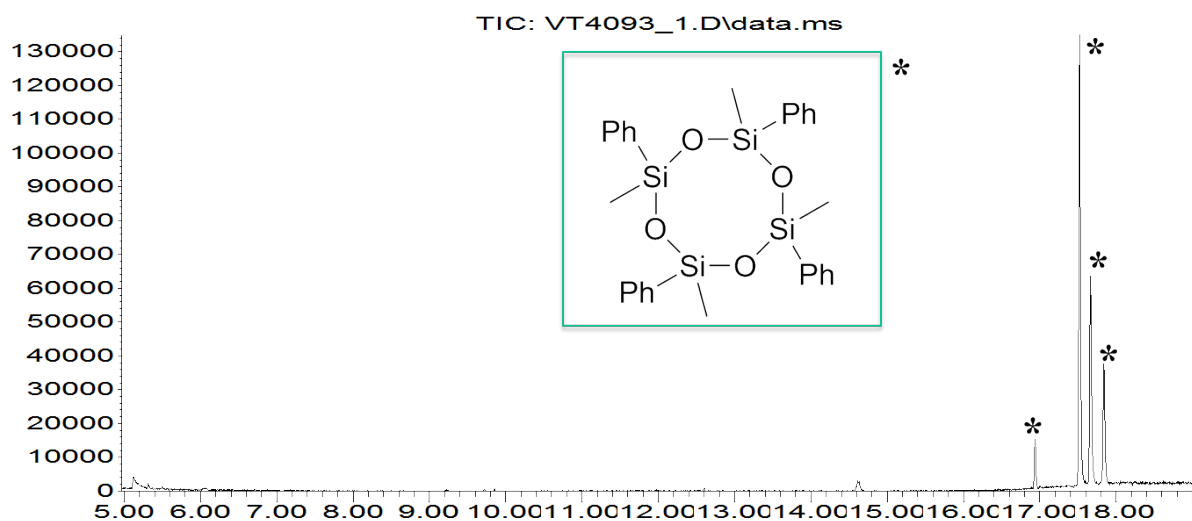

Time-->

**Figure S7(a).** GC-MS spectrum. Experiment performed on a sample of the reaction mixture containing 600  $\mu\text{L}$  of  $\text{DMF-d}_7$ , 5 mg of the Pt-containing monolith (357 ppm Pt;  $\sim 9$  nanomol of Pt) and 50  $\mu\text{L}$  of methylphenylsilane. The different peaks from  $t_R = 16.0$  min onwards correspond to eight-membered siloxane ring with molecular weight of 544.2 Da formed as the side product in the reduction reaction. No six-membered siloxane ring was formed in this process.

Abundance

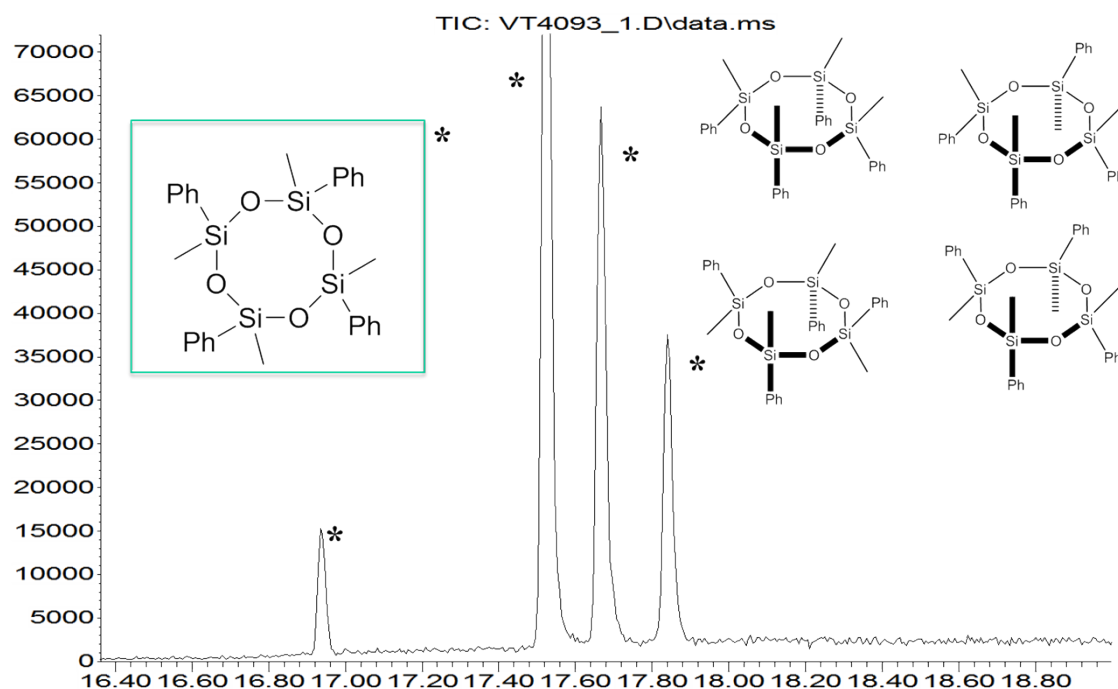

Time-->

**Figure S7(b).** GC-MS spectrum. Expansion of spectrum in Figure S7(a). Four peaks are realized for the four enantiomers.



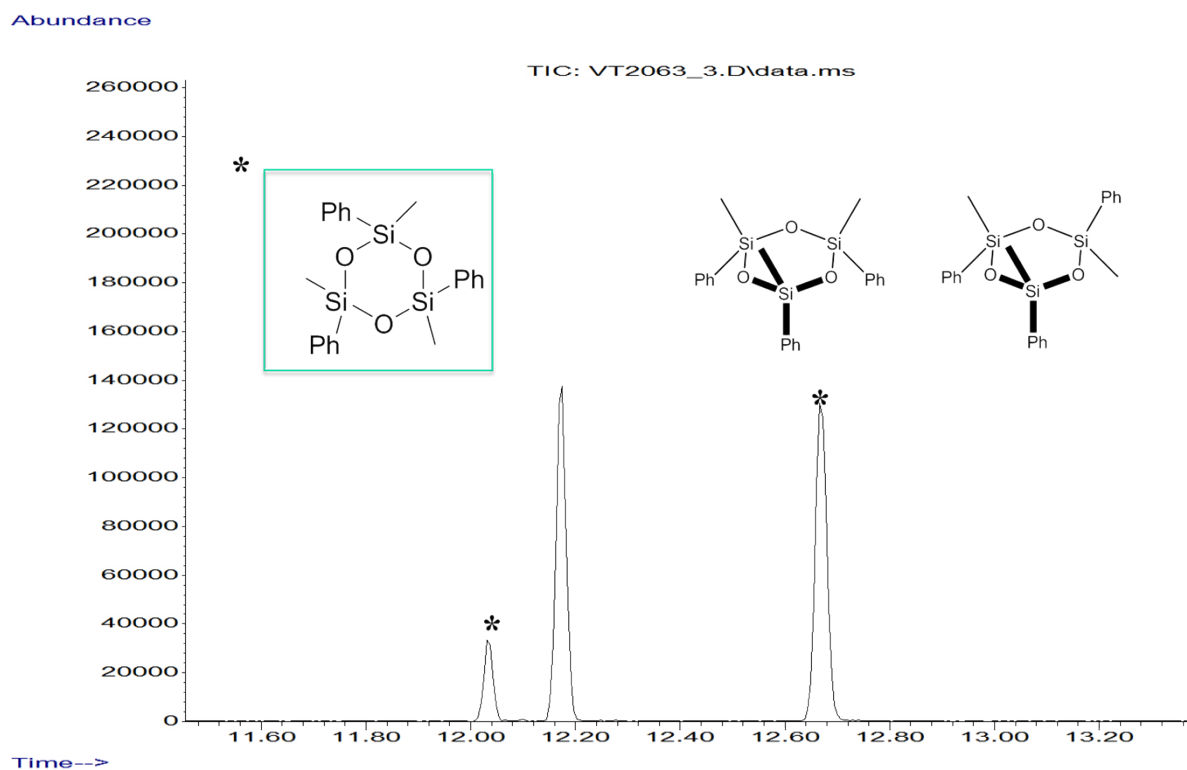

**Figure S8(b).** GC-MS spectrum. Expansion of spectrum shown in Figure S8(a). Two peaks are realized for the two enantiomers.

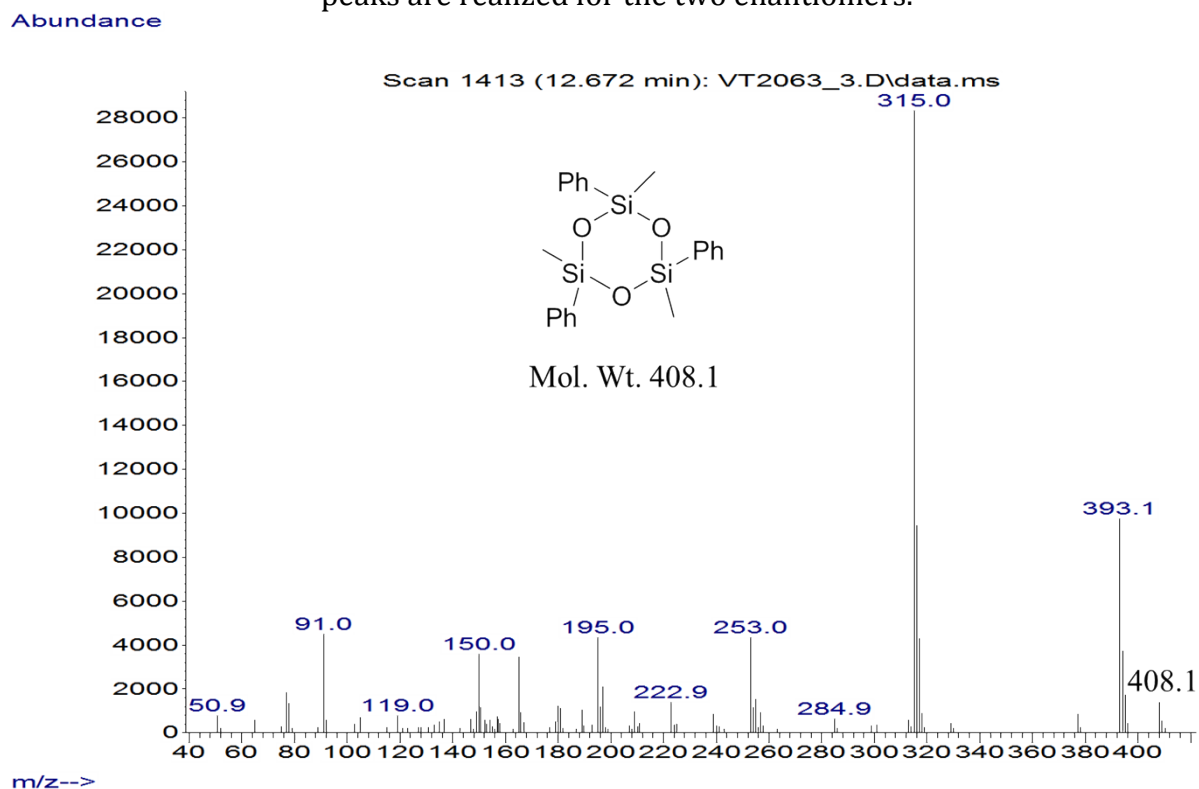

**Figure S8(c).** Fragmentation pattern of the peak at  $t_R = 12.672$  min in the GC-MS spectrum shown in Figure S8(b). The molecular weight of 408.1 Da corresponds to a six-membered siloxane ring. Both the peaks at  $t_R = 12.037$  min and  $t_R = 12.672$  min in Figure S8(b) show similar fragmentation patterns.

(1) Arias-Ugarte, R.; Sharma, H. K.; Morris, A. L. C.; Pannell, K. H. *J. Am. Chem. Soc.* **2011**, *134*, 848.

(2) Taori, V. P.; Bandari, R.; Buchmeiser, M. R. *Chem. Eur. J.* **2014**, *20*, 3292.
